# Supplementary material for: Identification and functional prediction of long non-coding RNA and mRNA related to connective tissue disease-associated interstitial lung diseases
Source: PubMed Central journal article supplement (PMC10729597; doi:10.2478/rir-2023-0030), 2023-12-19
Supplement: rir-2023-0030_sm.pdf [file rir-2023-0030_sm.pdf]

## Supplementary Materials

Table S1: General data of study population for lncRNA microarray analysis

|                 | CTD-ILD group (mixed specimens, n = 4) | CTD-NILD group (mixed specimens, n = 3) |
|-----------------|----------------------------------------|-----------------------------------------|
| Age (years)     | 38.56 ± 13.29                          | 38.58 ± 13.84                           |
| M/F (case)      | 3/13                                   | 2/10                                    |
| SSc, M/F (case) | 1/3                                    | 1/2                                     |
| RA, M/F (case)  | 1/3                                    | 1/2                                     |
| SLE, M/F (case) | 0/4                                    | 0/3                                     |
| SS, M/F (case)  | 1/3                                    | 0/3                                     |

Values were expressed as numbers or the mean ± standard deviation. CTD-ILD, connective tissue disease-associated interstitial lung diseases; CTD-NILD, connective tissue disease-without interstitial lung diseases; SSc, systemic sclerosis; RA, rheumatoid arthritis; SLE, systemic lupus erythematosus; SS, Sjogren's syndrome; M, male; F, female.

Table S2: Clinical and laboratory data of of SSc and RA

|                                          | (SSc+RA)-<br>ILD<br>(n = 60)      | (SSc+RA)-<br>NILD<br>(n = 60) | SSc-<br>(ILD+NILD)<br>(n = 60)   | RA-<br>(ILD+NILD)<br>(n = 60) | SSc-ILD<br>(n = 30)       | SSc-NILD<br>(n = 30) | RA-ILD<br>(n = 30)       | RA-NILD<br>(n = 30)      |
|------------------------------------------|-----------------------------------|-------------------------------|----------------------------------|-------------------------------|---------------------------|----------------------|--------------------------|--------------------------|
| Age, mean ± SD years                     | 55.18(10.21)                      | 54.00(9.95)                   | 53.98(9.32)                      | 55.20(10.79)                  | 54.57(9.04)               | 53.4(9.72)           | 55.8(11.39)              | 54.6(10.31)              |
| Male/female                              | 15/45                             | 14/46                         | 15/45                            | 14/46                         | 8/22                      | 7/23                 | 7/23                     | 7/23                     |
| Disease duration<br>median (IQR) years   | 6.10(1.90-<br>10.83) <sup>a</sup> | 2.25(1.23-<br>6.95)           | 3.00(1.30-<br>6.15) <sup>b</sup> | 6.65(1.58-<br>12.68)          | 4.50(1.00-<br>7.25)       | 2.10(1.30-<br>4.48)  | 7.90(3.30-<br>13.38)     | 2.50(1.18-<br>11.45)     |
| ESR, mean ± SD<br>(mm/h)                 | 48.80(36.62)                      | 39.27(35.24)                  | 33.92(32.22) <sup>b</sup>        | 54.15(37.18)                  | 39.73(37.81)              | 28.1(24.76)          | 57.87(33.6)              | 50.43(40.68)             |
| CRP, mean ± SD<br>(mg/L)                 | 19.96(30.28)                      | 14.48(29.22)                  | 8.61(11.87) <sup>b</sup>         | 25.83(38.66)                  | 11.89(14.07) <sup>c</sup> | 5.34(8.14)           | 28.03(39.15)             | 23.62(38.7)              |
| WBC, mean ± SD (×<br>10 <sup>9</sup> /L) | 7.58(3.53)                        | 7.23(2.86)                    | 7.38(2.67)                       | 7.44(3.68)                    | 7.4(2.88)                 | 7.36(2.50)           | 7.76(4.12)               | 7.11(3.22)               |
| GR, mean ± SD (×<br>10 <sup>9</sup> /L)  | 5.26(2.89)                        | 4.98(2.55)                    | 5.02(2.06)                       | 5.22(3.27)                    | 5.07(2.30)                | 4.97(1.82)           | 5.46(3.42)               | 4.98(3.15)               |
| LY, mean ± SD (×<br>10 <sup>9</sup> /L)  | 1.61(0.88)                        | 1.66(0.76)                    | 1.66(0.83)                       | 1.60(0.80)                    | 1.62(0.85)                | 1.71(0.83)           | 1.6(0.92)                | 1.6(0.69)                |
| MO, mean ± SD (×<br>10 <sup>9</sup> /L)  | 0.55(0.26) <sup>a</sup>           | 0.45(0.18)                    | 0.55(0.21) <sup>b</sup>          | 0.45(0.23)                    | 0.58(0.21)                | 0.51(0.20)           | 0.52(0.3) <sup>d</sup>   | 0.39(0.13)               |
| ALB, mean ± SD (g/L)                     | 40.77(5.11) <sup>a</sup>          | 42.7(3.70)                    | 41.1(4.18)                       | 42.37(4.84)                   | 40.37(4.49)               | 41.82(3.79)          | 41.16(5.72)              | 43.57(3.45)              |
| GLOB, mean ± SD<br>(g/L)                 | 31.07(6.47)                       | 32.48(5.86)                   | 33.19(6.91) <sup>b</sup>         | 30.36(5.04)                   | 32.85(7.47)               | 33.53(6.4)           | 29.28(4.77)              | 31.43(5.15)              |
| Anticentromere<br>antibody               | -                                 | -                             | 19(31.67%)                       | -                             | 10(33.33%)                | 9(30.00%)            | -                        | -                        |
| Anti-topoisomerase I                     | -                                 | -                             | 8(13.33%)                        | -                             | 4(13.33%)                 | 4(13.33%)            | -                        | -                        |
| Anti-Scl-70                              | -                                 | -                             | 21(35.00%)                       | -                             | 11(36.67%)                | 10(33.33%)           | -                        | -                        |
| RF-IgM, median (IQR)<br>(IU/mL)          | -                                 | -                             | -                                | 132.50(33.08-<br>337.25)      | -                         | -                    | 123.5(32.80-<br>285.50)  | 143.00(33.45-<br>443.00) |
| RF-IgG, median (IQR)<br>(U/mL)           | -                                 | -                             | -                                | 5.09(3.36-8.20)               | -                         | -                    | 5.02(3.16-<br>6.13)      | 5.41(3.85-<br>11.66)     |
| RF-IgA, median (IQR)<br>(U/mL)           | -                                 | -                             | -                                | 45.95(22.33-<br>132.77)       | -                         | -                    | 51.73(30.16-<br>127.28)  | 42.60(10.07-<br>160.13)  |
| CCP, median (IQR)<br>(RU/mL)             | -                                 | -                             | -                                | 313.19(34.19-<br>653.55)      | -                         | -                    | 260.79(49.54-<br>659.00) | 105.02(25.50-<br>482.43) |

SSc, systemic sclerosis; RA, rheumatoid arthritis; ILD, interstitial lung disease; NILD, without interstitial lung disease; ESR, erythrocyte sedimentation rate; CRP, reactive protein; WBC, white blood cell counts; GR, neutrophil granulocyte counts; LY, lymphocyte counts; MO, monocyte counts; ALB, albumin; GLOB, globulin; RF, rheumatoid factor; CCP, anti-cyclic citrullinated peptide antibody. Data are presented as the mean with standard deviation (SD), median with interquartile range (IQR), and numbers with percentages. Differences were tested by independent-sample T-test, Mann-Whitney U-test, and Chi-square test. P < 0.05 was considered to denote statistical significance. <sup>a</sup>: in comparison with (SSc+RA)-NILD group, <sup>b</sup>: in comparison with RA-(ILD+NILD) group, <sup>c</sup>: in comparison with SSc-NILD group, <sup>d</sup>: in comparison with RA-NILD group.

Table S3: Primer sequences used in the validation of genes

| Gene name        | Forward primers sequence(5'-3') | Reverse primers sequence(5'-3') |
|------------------|---------------------------------|---------------------------------|
| $\beta$ -actin   | GAGCTACGAGCTGCCTGACG            | GTAGTTTCGTGGATGCCACAG           |
| ENST00000602277  | CCTCCTATCAATCTCAGACTGCTGT       | CCCCCTCTGAATGAAGACGTCT          |
| ENST00000604692  | TCATGCCATCACGGGAAACAT           | ACCAACCAAAACCTAAGGAAAACAC       |
| T311354          | CCCTGCTCCAACCTGCCTTG            | ATGCAGTCACTGTTCCCTCTTG          |
| ENST00000453636  | CTCGCCGAAGTGCTTGTGAAG           | TTGCCTCTCTGGTTTGTGTGACTG        |
| NR_038446        | ATTCTACCATGCTACCAACAGACAAG      | GTGACTGGCAATACAGGGACCTAAAG      |
| ARG1(arginase-1) | GGACCTGCCCTTTGCTGACATC          | AGGCTGATTCTCCGTTCTTCTTGAC       |

Table S4: Details of ten pairs of lincRNA-mRNA

| lincRNA           | mRNA          | Chrom |
|-------------------|---------------|-------|
| ENST00000492960   | ANKRD36       | chr2  |
| ENST00000493529   | SERPINI1      | chr3  |
| ENST00000606452   | TIGD5         | chr8  |
| NR_024627         | SLC22A18AS    | chr11 |
| NR_037867         | ACSL1         | chr4  |
| T140209           | ZNF232        | chr17 |
| T200956           | TNFAIP6       | chr2  |
| T260556           | S100P         | chr4  |
| T311354           | ARG1          | chr6  |
| TCONS_I2_00009699 | RP11-812E19.9 | chr16 |

Chrom, chromosome number from which the lincRNA or mRNA was transcribed.

Table S5: Details of two pairs of antisense lncRNA-mRNA (distance &lt; 300 kb)

| Antisense lncRNA | mRNA  | Chrom |
|------------------|-------|-------|
| ENST00000464659  | GK    | chrX  |
| NR_109857        | WDR86 | chr7  |

Chrom, chromosome number from which the lincRNA or mRNA was transcribed.

Table S6: Details of five lncRNAs and one mRNA

| Transcript_type | Gene name        | P-value     | Fold change | Regulation | Chrom |
|-----------------|------------------|-------------|-------------|------------|-------|
| long noncoding  | ENST00000602277  | 0.008641533 | 4.7558537   | up         | chrX  |
| long noncoding  | ENST00000604692  | 0.033988100 | 2.6110634   | up         | chr2  |
| long noncoding  | T311354          | 0.01215425  | 2.4733744   | up         | chr6  |
| long noncoding  | ENST00000453636  | 0.002489511 | 3.7806322   | down       | chr2  |
| long noncoding  | NR_038446        | 0.046031098 | 2.6222282   | down       | chr8  |
| protein_coding  | ARG1(arginase-1) | 0.019525748 | 6.9776168   | up         | chr6  |

P-value, P-value calculated from unpaired t-test; Fold change, the absolute ratio (no log scale) of normalized intensities between two groups (CTD-ILD vs CTD-NILD); Chrom, chromosome number from which the lncRNA or mRNA was transcribed.

Table S7: Gene Ontology (GO) analysis enriches the top 10 items in the molecular function, cell composition, and biological process of upregulated mRNAs

| GO.ID      | Term                                 | Gene.Ontology      | Count | P value                   | Enrichment. Score(-log10(P value)) | Genes                                                                                                                                                                                                                                                                                                                                                                                                                      |
|------------|--------------------------------------|--------------------|-------|---------------------------|------------------------------------|----------------------------------------------------------------------------------------------------------------------------------------------------------------------------------------------------------------------------------------------------------------------------------------------------------------------------------------------------------------------------------------------------------------------------|
| GO:0030593 | neutrophil chemotaxis                | Biological process | 13    | $6.07217 \times 10^{-14}$ | 13.21665624                        | CXCL8//THBS4//CXCL1//CXCL2//CXCL3//IL1B//CCL4L1//CCL3L3//CCL3//CCL3L1//CCL18//CCL20//CCL24                                                                                                                                                                                                                                                                                                                                 |
| GO:0070098 | chemokine-mediated signaling pathway | Biological process | 12    | $2.26516 \times 10^{-13}$ | 12.64490043                        | CXCL1//CXCL2//CXCL3//CXCL8//CCL4L1//CCL3L3//CCL3//CCL3L1//CCL18//CCL20//CCL24//CCRL2                                                                                                                                                                                                                                                                                                                                       |
| GO:1990266 | neutrophil migration                 | Biological process | 13    | $5.65549 \times 10^{-13}$ | 12.24752981                        | CXCL1//CXCL2//CXCL3//IL1B//CXCL8//CCL4L1//CCL3L3//CCL3//CCL3L1//CCL18//CCL20//CCL24//THBS4                                                                                                                                                                                                                                                                                                                                 |
| GO:1990868 | response to chemokine                | Biological process | 12    | $7.50896 \times 10^{-13}$ | 12.12442021                        | CXCL1//CXCL2//CXCL3//CXCL8//CCL4L1//CCL3L3//CCL3//CCL3L1//CCL18//CCL20//CCL24//CCRL2                                                                                                                                                                                                                                                                                                                                       |
| GO:1990869 | cellular response to chemokine       | Biological process | 12    | $7.50896 \times 10^{-13}$ | 12.12442021                        | CXCL1//CXCL2//CXCL3//CXCL8//CCL4L1//CCL3L3//CCL3//CCL3L1//CCL18//CCL20//CCL24//CCRL2                                                                                                                                                                                                                                                                                                                                       |
| GO:0071621 | granulocyte chemotaxis               | Biological process | 13    | $9.54757 \times 10^{-13}$ | 12.02010724                        | CXCL1//CXCL2//CXCL3//IL1B//CXCL8//CCL4L1//CCL3L3//CCL3//CCL3L1//CCL18//CCL20//CCL24//THBS4                                                                                                                                                                                                                                                                                                                                 |
| GO:0097530 | granulocyte migration                | Biological process | 13    | $8.17045 \times 10^{-12}$ | 11.08775416                        | CXCL1//CXCL2//CXCL3//IL1B//CXCL8//CCL4L1//CCL3L3//CCL3//CCL3L1//CCL18//CCL20//CCL24//THBS4                                                                                                                                                                                                                                                                                                                                 |
| GO:0030595 | leukocyte chemotaxis                 | Biological process | 15    | $1.29557 \times 10^{-11}$ | 10.88753902                        | GPR183//CCL4L1//CCL3L3//CCL3//CCL3L1//CCL18//CCL20//CCL24//DEFA1//CXCL1//CXCL2//CXCL3//IL1B//CXCL8//THBS4                                                                                                                                                                                                                                                                                                                  |
| GO:0006950 | response to stress                   | Biological process | 58    | $3.23412 \times 10^{-11}$ | 10.49024433                        | CDC45//IL1A//IL1B//NAMPT1//DEFA1//LTF//HAVCR2//UCHL1//GADD45A//CDK1//CCNH//WDR33//CRISP3//INHBA//CD83//GBP5//CXCL1//CXCL2//CXCL3//CXCL8//CCL4L1//CCL3L3//NFE2L2//PTGS2//CCL3//CCL3L1//CCL18//CCL20//CCL24//NFKBIZ//TNFAIP6//NFKBID//CCRL2//FOSL1//E2F7//RGCC//E2F8//THBS4//PLAUR//BCL2A1//MELK//METRNL//ATP2B1//ARG1//RNF103//ATF3//FANCI//BIRC3//SERPINB2//ANXA3//AP1G1//CD55//CCNA2//SLC12A6//NUP98//SKIL//PPP1R10//IER3 |
| GO:0060326 | cell chemotaxis                      | Biological process | 16    | $7.96729 \times 10^{-11}$ | 10.09868951                        | GPR183//CCL4L1//CCL3L3//CCL3//CCL3L1//CCL18//CCL20//CCL24//DEFA1//CXCL1//CXCL2//CXCL3//IL1B//CXCL8//THBS4//CCRL2                                                                                                                                                                                                                                                                                                           |
| GO:0042581 | specific granule                     | Cellular component | 8     | $5.05935 \times 10^{-6}$  | 5.295904849                        | PLAUR//SLC2A3//CRISP3//CXCL1//ARG1//LTF//TCN1//ANXA3                                                                                                                                                                                                                                                                                                                                                                       |
| GO:1904724 | tertiary granule lumen               | Cellular component | 5     | $1.84733 \times 10^{-5}$  | 4.733455402                        | CRISP3//CXCL1//LTF//TCN1//TNFAIP6                                                                                                                                                                                                                                                                                                                                                                                          |
| GO:0035580 | specific granule lumen               | Cellular component | 5     | $3.32468 \times 10^{-5}$  | 4.478249933                        | CRISP3//CXCL1//ARG1//LTF//TCN1                                                                                                                                                                                                                                                                                                                                                                                             |
| GO:0030141 | secretory granule                    | Cellular component | 16    | $4.54057 \times 10^{-5}$  | 4.342889919                        | SKIL//ABCA13//CD55//SLC2A3//GPII//S100P//DEFA1//ARG1//PLAUR//CRISP3//CXCL1//LTF//TCN1//ANXA3//TNFAIP6//IL1B                                                                                                                                                                                                                                                                                                                |
| GO:0070820 | tertiary granule                     | Cellular component | 7     | $5.55607 \times 10^{-5}$  | 4.255232081                        | SLC2A3//CD55//CRISP3//CXCL1//LTF//TCN1//TNFAIP6                                                                                                                                                                                                                                                                                                                                                                            |
| GO:0099503 | secretory vesicle                    | Cellular component | 16    | 0.000333796               | 3.476519221                        | SKIL//IL1B//LTF//ABCA13//CD55//SLC2A3//GPII//S100P//DEFA1//ARG1//PLAUR//CRISP3//CXCL1//TCN1//ANXA3//TNFAIP6                                                                                                                                                                                                                                                                                                                |
| GO:0034774 | secretory granule lumen              | Cellular component | 8     | 0.000674105               | 3.171272193                        | DEFA1//ARG1//CRISP3//CXCL1//LTF//TCN1//GPII//S100P                                                                                                                                                                                                                                                                                                                                                                         |
| GO:0060205 | cytoplasmic vesicle lumen            | Cellular component | 8     | 0.000730487               | 3.136387666                        | GPII//S100P//DEFA1//ARG1//CRISP3//CXCL1//LTF//TCN1                                                                                                                                                                                                                                                                                                                                                                         |
| GO:0031983 | vesicle lumen                        | Cellular component | 8     | 0.00076007                | 3.119146212                        | GPII//S100P//DEFA1//ARG1//CRISP3//CXCL1//LTF//TCN1                                                                                                                                                                                                                                                                                                                                                                         |

|            |                                       |                    |    |                           |             |                                                                                                                                                                                                                                                                                                                                            |
|------------|---------------------------------------|--------------------|----|---------------------------|-------------|--------------------------------------------------------------------------------------------------------------------------------------------------------------------------------------------------------------------------------------------------------------------------------------------------------------------------------------------|
| GO:0005615 | extracellular space                   | Cellular component | 35 | 0.001528587               | 2.815709936 | <i>INHBA//NAMPT//CD55//DEFA1//GK//GPI//METRNL//ATAD2//ANXA3//LTF//ATP2B1//ERMN//S100P//SLC2A3//THBS4//CDK1//CRISP3//SCGB3A2//CXCL1//CXCL2//CXCL3//IL1A//IL1B//CXCL8//ARG1//CCL4L1//CCL3L3//SERPINB2//CCL3//CCL3L1//CCL18//CCL20//CCL24//TCN1//TNFAIP6</i>                                                                                  |
| GO:0008009 | chemokine activity                    | Molecular function | 11 | $9.43998 \times 10^{-15}$ | 14.0250288  | <i>CXCL1//CXCL2//CXCL3//CXCL8//CCL4L1//CCL3L3//CCL3//CCL3L1//CCL18//CCL20//CCL24</i>                                                                                                                                                                                                                                                       |
| GO:0042379 | chemokine receptor binding            | Molecular function | 12 | $1.77742 \times 10^{-14}$ | 13.75020881 | <i>CXCL8//CXCL1//CXCL2//CXCL3//CCL4L1//CCL3L3//CCL3//CCL3L1//CCL18//CCL20//CCL24//CCRL2</i>                                                                                                                                                                                                                                                |
| GO:0005125 | cytokine activity                     | Molecular function | 16 | $1.74962 \times 10^{-12}$ | 11.75705636 | <i>CXCL1//CXCL2//CXCL3//CXCL8//CCL4L1//CCL3L3//CCL3//CCL3L1//CCL18//CCL20//CCL24//NAMPT//GPI//IL1A//IL1B//INHBA</i>                                                                                                                                                                                                                        |
| GO:0048020 | CCR chemokine receptor binding        | Molecular function | 8  | $5.10992 \times 10^{-10}$ | 9.2915855   | <i>CCL3//CCL24//CCL20//CCL4L1//CCL3L3//CCL3L1//CCL18//CCRL2</i>                                                                                                                                                                                                                                                                            |
| GO:0048018 | receptor ligand activity              | Molecular function | 18 | $1.59097 \times 10^{-9}$  | 8.798337049 | <i>NAMPT//GPI//IL1A//IL1B//INHBA//METRNL//CXCL1//CXCL2//CXCL3//CXCL8//CCL4L1//CCL3L3//CCL3//CCL3L1//CCL18//CCL20//CCL24//THBS4</i>                                                                                                                                                                                                         |
| GO:0005126 | cytokine receptor binding             | Molecular function | 14 | $1.77089 \times 10^{-9}$  | 8.75180935  | <i>IL1A//IL1B//CXCL8//CXCL1//CXCL2//CXCL3//CCL4L1//CCL3L3//CCL3//CCL3L1//CCL18//CCL20//CCL24//CCRL2</i>                                                                                                                                                                                                                                    |
| GO:0030546 | signaling receptor activator activity | Molecular function | 18 | $1.86949 \times 10^{-9}$  | 8.728277929 | <i>NAMPT//GPI//IL1A//IL1B//INHBA//METRNL//CXCL1//CXCL2//CXCL3//CXCL8//CCL4L1//CCL3L3//CCL3//CCL3L1//CCL18//CCL20//CCL24//THBS4</i>                                                                                                                                                                                                         |
| GO:0030545 | receptor regulator activity           | Molecular function | 18 | $6.74076 \times 10^{-9}$  | 8.171291332 | <i>NAMPT//GPI//IL1A//IL1B//INHBA//METRNL//CXCL1//CXCL2//CXCL3//CXCL8//CCL4L1//CCL3L3//CCL3//CCL3L1//CCL18//CCL20//CCL24//THBS4</i>                                                                                                                                                                                                         |
| GO:0001664 | G protein-coupled receptor binding    | Molecular function | 13 | $4.25292 \times 10^{-8}$  | 7.371312408 | <i>CXCL8//CXCL1//CXCL2//CXCL3//CCL4L1//CCL3L3//CCL3//CCL3L1//CCL18//CCL20//CCL24//UCHL1//CCRL2</i>                                                                                                                                                                                                                                         |
| GO:0098772 | molecular function regulator          | Molecular function | 46 | $2.27062 \times 10^{-6}$  | 5.643855999 | <i>E2F7//ATF3//NFE2L2//SKIL//TBX15//E2F8//FOSL1//KLF7//ZNF267//ZNF644//MYSM1//NUP98//GMNN//PHACTR1//PPP1R10//SERPINB2//LTF//FGD6//RASGEF1B//DEPDC1B//NAMPT//GPI//IL1A//IL1B//INHBA//METRNL//CXCL1//CXCL2//CXCL3//CXCL8//CCL4L1//CCL3L3//CCL3//CCL3L1//CCL18//CCL20//CCL24//THBS4//ST20//CCNH//CCNA2//DENND3//ANXA3//RGCC//BIRC3//SOCS4</i> |

Table S7: Gene Ontology (GO) analysis enriches the top 10 items in the molecular function, cell composition, and biological process of downregulated mRNAs

| GO.ID      | Term                                                          | Gene.Ontology      | Count | P value     | Enrichment. Score (-log <sub>10</sub> (P value)) | Genes                      |
|------------|---------------------------------------------------------------|--------------------|-------|-------------|--------------------------------------------------|----------------------------|
| GO:0050854 | regulation of antigen receptor-mediated signaling pathway     | Biological process | 3     | 0.001663014 | 2.779104055                                      | <i>CD19//PAWR//STAP1</i>   |
| GO:1901880 | negative regulation of protein depolymerization               | Biological process | 3     | 0.001805414 | 2.743423243                                      | <i>CAMSAP2//AVIL//ADD1</i> |
| GO:0046058 | cAMP metabolic process                                        | Biological process | 2     | 0.002504874 | 2.60121414                                       | <i>ADCY9//PDE7A</i>        |
| GO:0043242 | negative regulation of protein-containing complex disassembly | Biological process | 3     | 0.002631008 | 2.579877824                                      | <i>CAMSAP2//AVIL//ADD1</i> |
| GO:0046339 | diacylglycerol metabolic process                              | Biological process | 2     | 0.003231852 | 2.490548567                                      | <i>GPAM//AVIL</i>          |

|            |                                                                 |                    |    |             |             |                                                                                      |
|------------|-----------------------------------------------------------------|--------------------|----|-------------|-------------|--------------------------------------------------------------------------------------|
| GO:1901879 | regulation of protein depolymerization                          | Biological process | 3  | 0.003327459 | 2.477887293 | CAMSAP2//AVIL//ADD1                                                                  |
| GO:0120032 | regulation of plasma membrane bound cell projection assembly    | Biological process | 4  | 0.003459571 | 2.460977741 | AVIL//C15ORF62//STAP1//EPS8L1                                                        |
| GO:0051016 | barbed-end actin filament capping                               | Biological process | 2  | 0.003493543 | 2.456733907 | AVIL//ADD1                                                                           |
| GO:0060491 | regulation of cell projection assembly                          | Biological process | 4  | 0.003596459 | 2.444124875 | AVIL//C15ORF62//STAP1//EPS8L1                                                        |
| GO:0050855 | regulation of B cell receptor signaling pathway                 | Biological process | 2  | 0.004335786 | 2.362932206 | STAP1//CD19                                                                          |
| GO:0015629 | actin cytoskeleton                                              | Cellular component | 7  | 0.002010957 | 2.696597316 | SIPA1L3//ACTL7B//AVIL//PAWR//ADD1//GYS2//DDX58                                       |
| GO:0031256 | leading edge membrane                                           | Cellular component | 4  | 0.00340537  | 2.46783565  | CNTNAP2//DDX58//EPS8L1//SGCE                                                         |
| GO:0005911 | cell-cell junction                                              | Cellular component | 6  | 0.007811412 | 2.107270449 | ADD1//TNKS1BP1//DDX58//MAGI2//CNTNAP2//SIPA1L3                                       |
| GO:0070160 | tight junction                                                  | Cellular component | 3  | 0.010700046 | 1.970614347 | DDX58//MAGI2//SIPA1L3                                                                |
| GO:0005887 | integral component of plasma membrane                           | Cellular component | 12 | 0.012156394 | 1.915195247 | CNTNAP2//KCNG1//ADCY9//FCRL1//DCBLD2//ADORA3//OPN3//SLC10A1//TLR5//FCRLA//SGCE//CD19 |
| GO:0031252 | cell leading edge                                               | Cellular component | 5  | 0.016451279 | 1.783800323 | AVIL//CNTNAP2//DDX58//EPS8L1//SGCE                                                   |
| GO:0031226 | intrinsic component of plasma membrane                          | Cellular component | 12 | 0.017172376 | 1.765169621 | ADCY9//FCRL1//DCBLD2//ADORA3//OPN3//SLC10A1//TLR5//FCRLA//SGCE//CD19//CNTNAP2//KCNG1 |
| GO:0000790 | nuclear chromatin                                               | Cellular component | 10 | 0.018177597 | 1.74046353  | PPARGC1A//TNKS1BP1//E2F5//ZNF718//SMAD9//ARGFX//PAWR//NEUROG2//ZNF232//ZNF697        |
| GO:0032589 | neuron projection membrane                                      | Cellular component | 2  | 0.019632547 | 1.707023363 | CNTNAP2//SGCE                                                                        |
| GO:0043005 | neuron projection                                               | Cellular component | 10 | 0.021080223 | 1.676124805 | OPN3//PDC//AVIL//ADCY9//CNTNAP2//PIAS3//MAGI2//CDK5R2//SGCE//PPARGC1A                |
| GO:0030159 | signaling receptor complex adaptor activity                     | Molecular function | 3  | 0.000510617 | 3.291904622 | STAP1//BLNK//MAGI2                                                                   |
| GO:0005068 | transmembrane receptor protein tyrosine kinase adaptor activity | Molecular function | 2  | 0.001088674 | 2.96310215  | STAP1//BLNK                                                                          |
| GO:0035591 | signaling adaptor activity                                      | Molecular function | 3  | 0.002230455 | 2.651606456 | STAP1//BLNK//MAGI2                                                                   |
| GO:0030507 | spectrin binding                                                | Molecular function | 2  | 0.005084637 | 2.293740017 | ADD1//CAMSAP2                                                                        |
| GO:0016779 | nucleotidyltransferase activity                                 | Molecular function | 3  | 0.014310479 | 1.844345816 | NMNAT1//POLR1A//CTU1                                                                 |
| GO:0005089 | Rho guanyl-nucleotide exchange factor activity                  | Molecular function | 2  | 0.022016884 | 1.657244146 | EPS8L1//PLEKHG1                                                                      |
| GO:0017048 | Rho GTPase binding                                              | Molecular function | 3  | 0.024023052 | 1.619371813 | EPS8L1//PLEKHG1//C15ORF62                                                            |
| GO:0003779 | actin binding                                                   | Molecular function | 5  | 0.025597474 | 1.591802885 | AVIL//ADD1//PAWR//EPS8L1//CDK5R2                                                     |
| GO:0030971 | receptor tyrosine kinase binding                                | Molecular function | 2  | 0.030880058 | 1.510321888 | STAP1//BLNK                                                                          |
| GO:0001618 | virus receptor activity                                         | Molecular function | 2  | 0.032473957 | 1.488464789 | CR2//SLC10A1                                                                         |

Table S8: Kyoto encyclopedia of genes and genomes (KEGG) analysis enriched the top 10 items of upregulated mRNAs

| PathwayID | Definition                                                                           | OriginalWebSite                                                                                                                                                                                                                                                                     | Fisher-P value            | Selection-Counts | Enrichment_Score | Genes                                                                                                    |
|-----------|--------------------------------------------------------------------------------------|-------------------------------------------------------------------------------------------------------------------------------------------------------------------------------------------------------------------------------------------------------------------------------------|---------------------------|------------------|------------------|----------------------------------------------------------------------------------------------------------|
| hsa04061  | Viral protein interaction with cytokine and cytokine receptor - Homo sapiens (human) | <a href="http://www.genome.jp/kegg-bin/show_pathway?hsa04061+6362+6364+6369+6348+6349+414062+388372+9560+2919+2920+2921+3576">http://www.genome.jp/kegg-bin/show_pathway?hsa04061+6362+6364+6369+6348+6349+414062+388372+9560+2919+2920+2921+3576</a>                               | $7.04606 \times 10^{-12}$ | 12               | 11.152053        | CCL18//CCL20//CCL24//CCL3//CCL3L1//CCL3L3//CCL4L1//CCL4L2//CXCL1//CXCL2//CXCL3//CXCL8                    |
| hsa04064  | NF-kappa B signaling pathway - Homo sapiens (human)                                  | <a href="http://www.genome.jp/kegg-bin/show_pathway?hsa04064+597+330+388372+9560+2919+2920+2921+3576+1647+3553+5743">http://www.genome.jp/kegg-bin/show_pathway?hsa04064+597+330+388372+9560+2919+2920+2921+3576+1647+3553+5743</a>                                                 | $2.32827 \times 10^{-10}$ | 11               | 9.632967         | BCL2A1//BIRC3//CCL4L1//CCL4L2//CXCL1//CXCL2//CXCL3//CXCL8//GADD45A//IL1B//PTGS2                          |
| hsa05323  | Rheumatoid arthritis - Homo sapiens (human)                                          | <a href="http://www.genome.jp/kegg-bin/show_pathway?hsa05323+6364+6348+6349+414062+2919+2920+2921+3576+3552+3553">http://www.genome.jp/kegg-bin/show_pathway?hsa05323+6364+6348+6349+414062+2919+2920+2921+3576+3552+3553</a>                                                       | $1.4042 \times 10^{-9}$   | 10               | 8.852571         | CCL20//CCL3//CCL3L1//CCL3L3//CXCL1//CXCL2//CXCL3//CXCL8//IL1A//IL1B                                      |
| hsa04060  | Cytokine-cytokine receptor interaction - Homo sapiens (human)                        | <a href="http://www.genome.jp/kegg-bin/show_pathway?hsa04060+6362+6364+6369+6348+6349+414062+388372+9560+2919+2920+2921+3576+3552+3553+3624">http://www.genome.jp/kegg-bin/show_pathway?hsa04060+6362+6364+6369+6348+6349+414062+388372+9560+2919+2920+2921+3576+3552+3553+3624</a> | $3.01729 \times 10^{-9}$  | 15               | 8.520384         | CCL18//CCL20//CCL24//CCL3//CCL3L1//CCL3L3//CCL4L1//CCL4L2//CXCL1//CXCL2//CXCL3//CXCL8//IL1A//IL1B//INHBA |
| hsa04062  | Chemokine signaling pathway - Homo sapiens (human)                                   | <a href="http://www.genome.jp/kegg-bin/show_pathway?hsa04062+6362+6364+6369+6348+6349+414062+388372+9560+2919+2920+2921+3576">http://www.genome.jp/kegg-bin/show_pathway?hsa04062+6362+6364+6369+6348+6349+414062+388372+9560+2919+2920+2921+3576</a>                               | $1.46616 \times 10^{-8}$  | 12               | 7.83382          | CCL18//CCL20//CCL24//CCL3//CCL3L1//CCL3L3//CCL4L1//CCL4L2//CXCL1//CXCL2//CXCL3//CXCL8                    |
| hsa04657  | IL-17 signaling pathway - Homo sapiens (human)                                       | <a href="http://www.genome.jp/kegg-bin/show_pathway?hsa04657+6364+2919+2920+2921+3576+8061+3553+5743">http://www.genome.jp/kegg-bin/show_pathway?hsa04657+6364+2919+2920+2921+3576+8061+3553+5743</a>                                                                               | $4.45069 \times 10^{-7}$  | 8                | 6.351573         | CCL20//CXCL1//CXCL2//CXCL3//CXCL8//FOSL1//IL1B//PTGS2                                                    |
| hsa04621  | NOD-like receptor signaling pathway - Homo sapiens (human)                           | <a href="http://www.genome.jp/kegg-bin/show_pathway?hsa04621+330+2919+2920+2921+3576+1667+115362+3553+10135">http://www.genome.jp/kegg-bin/show_pathway?hsa04621+330+2919+2920+2921+3576+1667+115362+3553+10135</a>                                                                 | $7.47666 \times 10^{-6}$  | 9                | 5.126292         | BIRC3//CXCL1//CXCL2//CXCL3//CXCL8//DEFA1//GBP5//IL1B//NAMPT                                              |
| hsa05146  | Amoebiasis - Homo sapiens (human)                                                    | <a href="http://www.genome.jp/kegg-bin/show_pathway?hsa05146+383+2919+2920+2921+3576+3553+3914">http://www.genome.jp/kegg-bin/show_pathway?hsa05146+383+2919+2920+2921+3576+3553+3914</a>                                                                                           | $1.04464 \times 10^{-5}$  | 7                | 4.981033         | ARG1//CXCL1//CXCL2//CXCL3//CXCL8//IL1B//LAMB3                                                            |
| hsa04620  | Toll-like receptor signaling pathway - Homo sapiens (human)                          | <a href="http://www.genome.jp/kegg-bin/show_pathway?hsa04620+6348+6349+414062+388372+9560+3576+3553">http://www.genome.jp/kegg-bin/show_pathway?hsa04620+6348+6349+414062+388372+9560+3576+3553</a>                                                                                 | $1.18764 \times 10^{-5}$  | 7                | 4.925315         | CCL3//CCL3L1//CCL3L3//CCL4L1//CCL4L2//CXCL8//IL1B                                                        |
| hsa04668  | TNF signaling pathway - Homo sapiens (human)                                         | <a href="http://www.genome.jp/kegg-bin/show_pathway?hsa04668+330+6364+2919+2920+2921+3553+5743">http://www.genome.jp/kegg-bin/show_pathway?hsa04668+330+6364+2919+2920+2921+3553+5743</a>                                                                                           | $1.93226 \times 10^{-5}$  | 7                | 4.713935         | BIRC3//CCL20//CXCL1//CXCL2//CXCL3//IL1B//PTGS2                                                           |

Table S8: Kyoto encyclopedia of genes and genomes (KEGG) analysis enriched the top 9 items (only 9 items in total) of downregulated mRNAs

| PathwayID | Definition                                               | OriginalWebSite                                                                                                                                     | Fisher-P value | Selection-Counts | Enrichment_Score | Genes           |
|-----------|----------------------------------------------------------|-----------------------------------------------------------------------------------------------------------------------------------------------------|----------------|------------------|------------------|-----------------|
| hsa04662  | B cell receptor signaling pathway - Homo sapiens (human) | <a href="http://www.genome.jp/kegg-bin/show_pathway?hsa04662+29760+930+1380">http://www.genome.jp/kegg-bin/show_pathway?hsa04662+29760+930+1380</a> | 0.00275818     | 3                | 2.559377         | BLNK//CD19//CR2 |

|          |                                                     |                                                                                                                                                                 |             |   |          |                               |
|----------|-----------------------------------------------------|-----------------------------------------------------------------------------------------------------------------------------------------------------------------|-------------|---|----------|-------------------------------|
| hsa05169 | Epstein-Barr virus infection - Homo sapiens (human) | <a href="http://www.genome.jp/kegg-bin/show_pathway?hsa05169+29760+930+1380+23586">http://www.genome.jp/kegg-bin/show_pathway?hsa05169+29760+930+1380+23586</a> | 0.004870649 | 4 | 2.312413 | <i>BLNK//CD19//CR2//DDX58</i> |
| hsa05340 | Primary immunodeficiency - Homo sapiens (human)     | <a href="http://www.genome.jp/kegg-bin/show_pathway?hsa05340+29760+930">http://www.genome.jp/kegg-bin/show_pathway?hsa05340+29760+930</a>                       | 0.007555506 | 2 | 2.121736 | <i>BLNK//CD19</i>             |
| hsa04015 | Rap1 signaling pathway - Homo sapiens (human)       | <a href="http://www.genome.jp/kegg-bin/show_pathway?hsa04015+115+9863+23094">http://www.genome.jp/kegg-bin/show_pathway?hsa04015+115+9863+23094</a>             | 0.03528105  | 3 | 1.452458 | <i>ADCY9//MAGI2//SIPA1L3</i>  |
| hsa04211 | Longevity regulating pathway - Homo sapiens (human) | <a href="http://www.genome.jp/kegg-bin/show_pathway?hsa04211+115+10891">http://www.genome.jp/kegg-bin/show_pathway?hsa04211+115+10891</a>                       | 0.03776135  | 2 | 1.422952 | <i>ADCY9//PPARGC1A</i>        |
| hsa04976 | Bile secretion - Homo sapiens (human)               | <a href="http://www.genome.jp/kegg-bin/show_pathway?hsa04976+115+6554">http://www.genome.jp/kegg-bin/show_pathway?hsa04976+115+6554</a>                         | 0.03853793  | 2 | 1.414112 | <i>ADCY9//SLC10A1</i>         |
| hsa05032 | Morphine addiction - Homo sapiens (human)           | <a href="http://www.genome.jp/kegg-bin/show_pathway?hsa05032+115+5150">http://www.genome.jp/kegg-bin/show_pathway?hsa05032+115+5150</a>                         | 0.03932068  | 2 | 1.405379 | <i>ADCY9//PDE7A</i>           |
| hsa04350 | TGF-beta signaling pathway - Homo sapiens (human)   | <a href="http://www.genome.jp/kegg-bin/show_pathway?hsa04350+1875+4093">http://www.genome.jp/kegg-bin/show_pathway?hsa04350+1875+4093</a>                       | 0.04170544  | 2 | 1.379807 | <i>E2F5//SMAD9</i>            |
| hsa04640 | Hematopoietic cell lineage - Homo sapiens (human)   | <a href="http://www.genome.jp/kegg-bin/show_pathway?hsa04640+930+1380">http://www.genome.jp/kegg-bin/show_pathway?hsa04640+930+1380</a>                         | 0.04579888  | 2 | 1.339145 | <i>CD19//CR2</i>              |

---
